# Supplementary material for: A Multi-Metric Approach to Investigate the Effects of Weather Conditions on the Demographic of a Terrestrial Mammal, the European Badger (Meles meles)
Source: PubMed Central journal article supplement (PMC3708947; doi:10.1371/journal.pone.0068116), 2013-07-11
Supplement: pone.0068116.s001.pdf [file pone.0068116.s001.pdf]

Table S1

| Model           | QAICc | ΔQAICc | AICc Weights | Coefficient linking <i>adult</i> survival to specific climatic variables |       |        |       |                 |       |        |       |        |       |        |       |                 |       |        |       | Coefficient linking <i>juvenile</i> survival to specific climatic variables |       |        |       |                 |  |    |  |     |  |    |  |                  |  |    |  |  |  |
|-----------------|-------|--------|--------------|--------------------------------------------------------------------------|-------|--------|-------|-----------------|-------|--------|-------|--------|-------|--------|-------|-----------------|-------|--------|-------|-----------------------------------------------------------------------------|-------|--------|-------|-----------------|--|----|--|-----|--|----|--|------------------|--|----|--|--|--|
|                 |       |        |              | mT                                                                       |       | SE     |       | mT <sup>2</sup> |       | SE     |       | aT     |       | SE     |       | sT <sup>2</sup> |       | SE     |       | mR                                                                          |       | SE     |       | mR <sup>2</sup> |  | SE |  | cvR |  | SE |  | cvR <sup>2</sup> |  | SE |  |  |  |
|                 |       |        |              |                                                                          |       |        |       |                 |       |        |       |        |       |        |       |                 |       |        |       |                                                                             |       |        |       |                 |  |    |  |     |  |    |  |                  |  |    |  |  |  |
| mR_int          | 10572 | 0.00   | 0.300        |                                                                          |       |        |       |                 |       |        |       |        |       |        |       |                 |       |        |       |                                                                             |       |        |       |                 |  |    |  |     |  |    |  |                  |  |    |  |  |  |
| sT_mR_int       | 10574 | 1.97   | 0.112        |                                                                          |       |        |       |                 |       |        |       |        |       |        |       |                 |       |        |       |                                                                             |       |        |       |                 |  |    |  |     |  |    |  |                  |  |    |  |  |  |
| mT_mR_NoInt     | 10574 | 2.50   | 0.086        | -0.195                                                                   | 0.243 | 0.009  | 0.101 |                 |       |        |       |        |       |        |       |                 |       |        |       |                                                                             |       |        |       |                 |  |    |  |     |  |    |  |                  |  |    |  |  |  |
| mR_NoInt        | 10575 | 2.95   | 0.069        |                                                                          |       |        |       |                 |       |        |       |        |       |        |       |                 |       |        |       |                                                                             |       |        |       |                 |  |    |  |     |  |    |  |                  |  |    |  |  |  |
| mT_mR_int       | 10575 | 3.17   | 0.061        | -0.233                                                                   | 0.294 | 0.027  | 0.120 |                 |       |        |       |        |       |        |       |                 |       |        |       |                                                                             |       |        |       |                 |  |    |  |     |  |    |  |                  |  |    |  |  |  |
| mR_cvR_int      | 10575 | 3.67   | 0.048        |                                                                          |       |        |       |                 |       |        |       |        |       |        |       |                 |       |        |       |                                                                             |       |        |       |                 |  |    |  |     |  |    |  |                  |  |    |  |  |  |
| mT_sT_mR_NoInt  | 10576 | 3.93   | 0.042        | -0.116                                                                   | 0.237 | -0.026 | 0.102 |                 |       |        |       |        |       |        |       |                 |       |        |       |                                                                             |       |        |       |                 |  |    |  |     |  |    |  |                  |  |    |  |  |  |
| sT_mR_NoInt     | 10576 | 4.12   | 0.038        |                                                                          |       |        |       |                 |       |        |       |        |       |        |       |                 |       |        |       |                                                                             |       |        |       |                 |  |    |  |     |  |    |  |                  |  |    |  |  |  |
| aT_mR_int       | 10576 | 4.50   | 0.032        |                                                                          |       |        |       | 0.048           | 0.105 | -0.010 | 0.077 |        |       |        |       |                 |       |        |       |                                                                             |       |        |       |                 |  |    |  |     |  |    |  |                  |  |    |  |  |  |
| aT_mR_cvR_int   | 10577 | 5.68   | 0.018        |                                                                          |       |        |       | 0.081           | 0.121 | -0.039 | 0.087 |        |       |        |       |                 |       |        |       |                                                                             |       |        |       |                 |  |    |  |     |  |    |  |                  |  |    |  |  |  |
| mT_sT_mR_int    | 10578 | 5.81   | 0.016        | -0.130                                                                   | 0.293 | -0.015 | 0.123 |                 |       |        |       |        |       |        |       |                 |       |        |       |                                                                             |       |        |       |                 |  |    |  |     |  |    |  |                  |  |    |  |  |  |
| mT_NoInt        | 10578 | 6.12   | 0.014        | -0.003                                                                   | 0.217 | -0.088 | 0.089 |                 |       |        |       |        |       |        |       |                 |       |        |       |                                                                             |       |        |       |                 |  |    |  |     |  |    |  |                  |  |    |  |  |  |
| mT_mR_cvR_NoInt | 10578 | 6.46   | 0.012        | -0.208                                                                   | 0.247 | 0.012  | 0.103 |                 |       |        |       |        |       |        |       |                 |       |        |       |                                                                             |       |        |       |                 |  |    |  |     |  |    |  |                  |  |    |  |  |  |
| aT_sT_mR_NoInt  | 10578 | 6.48   | 0.012        | -0.374                                                                   | 0.349 | 0.071  | 0.140 | 0.130           | 0.109 | -0.051 | 0.079 |        |       |        |       |                 |       |        |       |                                                                             |       |        |       |                 |  |    |  |     |  |    |  |                  |  |    |  |  |  |
| all_mT_int      | 10578 | 6.62   | 0.011        |                                                                          |       |        |       | 0.128           | 0.142 | 0.001  | 0.092 | -0.027 | 0.106 | -0.114 | 0.091 |                 |       |        |       |                                                                             |       |        |       |                 |  |    |  |     |  |    |  |                  |  |    |  |  |  |
| aT_mR_NoInt     | 10578 | 6.71   | 0.010        | -0.040                                                                   | 0.090 | -0.012 | 0.066 |                 |       |        |       |        |       |        |       |                 |       |        |       |                                                                             |       |        |       |                 |  |    |  |     |  |    |  |                  |  |    |  |  |  |
| mT_mR_cvR_int   | 10578 | 6.77   | 0.010        | -0.217                                                                   | 0.300 | 0.015  | 0.122 |                 |       |        |       |        |       |        |       |                 |       |        |       |                                                                             |       |        |       |                 |  |    |  |     |  |    |  |                  |  |    |  |  |  |
| mR_cvR_NoInt    | 10579 | 6.94   | 0.009        |                                                                          |       |        |       |                 |       |        |       |        |       |        |       |                 |       |        |       |                                                                             |       |        |       |                 |  |    |  |     |  |    |  |                  |  |    |  |  |  |
| mT_sT_NoInt     | 10579 | 7.35   | 0.008        | -0.012                                                                   | 0.223 | -0.084 | 0.095 |                 |       |        |       |        |       |        |       |                 |       |        |       |                                                                             |       |        |       |                 |  |    |  |     |  |    |  |                  |  |    |  |  |  |
| sT_mR_cvR_int   | 10579 | 7.62   | 0.007        |                                                                          |       |        |       |                 |       |        |       |        |       |        |       |                 |       |        |       |                                                                             |       |        |       |                 |  |    |  |     |  |    |  |                  |  |    |  |  |  |
| aT_sT_mR_int    | 10579 | 7.64   | 0.007        |                                                                          |       |        |       | -0.046          | 0.100 | 0.054  | 0.074 |        |       |        |       |                 |       |        |       |                                                                             |       |        |       |                 |  |    |  |     |  |    |  |                  |  |    |  |  |  |
| aT_int          | 10579 | 7.79   | 0.006        |                                                                          |       |        |       | 0.006           | 0.101 | -0.019 | 0.069 |        |       |        |       |                 |       |        |       |                                                                             |       |        |       |                 |  |    |  |     |  |    |  |                  |  |    |  |  |  |
| aT_sT_mR_int    | 10579 | 7.79   | 0.006        |                                                                          |       |        |       | 0.050           | 0.114 | 0.033  | 0.084 | 0.024  | 0.100 | -0.127 | 0.091 | 0.196           | 0.131 | -0.009 | 0.147 |                                                                             |       |        |       |                 |  |    |  |     |  |    |  |                  |  |    |  |  |  |
| all_aT_NoInt    | 10580 | 7.86   | 0.006        | -0.115                                                                   | 0.242 | -0.029 | 0.104 |                 |       |        |       |        |       |        |       |                 |       |        |       |                                                                             |       |        |       |                 |  |    |  |     |  |    |  |                  |  |    |  |  |  |
| all_cvR_NoInt   | 10580 | 7.97   | 0.006        | -0.157                                                                   | 0.279 | -0.009 | 0.118 | 0.027           | 0.110 | 0.007  | 0.080 | -0.024 | 0.099 | -0.114 | 0.081 | 0.115           | 0.118 | -0.203 | 0.126 |                                                                             |       |        |       |                 |  |    |  |     |  |    |  |                  |  |    |  |  |  |
| sT_mR_cvR_NoInt | 10580 | 8.16   | 0.005        |                                                                          |       |        |       |                 |       |        |       |        |       |        |       |                 |       |        |       |                                                                             |       |        |       |                 |  |    |  |     |  |    |  |                  |  |    |  |  |  |
| cvR_NoInt       | 10580 | 8.27   | 0.005        |                                                                          |       |        |       |                 |       |        |       |        |       |        |       |                 |       |        |       |                                                                             |       |        |       |                 |  |    |  |     |  |    |  |                  |  |    |  |  |  |
| mT_mR_NoInt     | 10580 | 8.59   | 0.004        | -0.043                                                                   | 0.217 | -0.054 | 0.092 |                 |       |        |       |        |       |        |       |                 |       |        |       |                                                                             |       |        |       |                 |  |    |  |     |  |    |  |                  |  |    |  |  |  |
| all_sT_int      | 10580 | 8.66   | 0.004        | -0.317                                                                   | 0.356 | 0.042  | 0.144 | 0.151           | 0.126 | -0.096 | 0.097 |        |       |        |       |                 |       |        |       |                                                                             |       |        |       |                 |  |    |  |     |  |    |  |                  |  |    |  |  |  |
| mT_sT_int       | 10580 | 8.70   | 0.004        | 0.066                                                                    | 0.224 | -0.109 | 0.090 | -0.068          | 0.093 | -0.031 | 0.060 |        |       |        |       |                 |       |        |       |                                                                             |       |        |       |                 |  |    |  |     |  |    |  |                  |  |    |  |  |  |
| g(p(L))         | 10580 | 8.72   | 0.004        |                                                                          |       |        |       |                 |       |        |       |        |       |        |       |                 |       |        |       |                                                                             |       |        |       |                 |  |    |  |     |  |    |  |                  |  |    |  |  |  |
| cvR_int         | 10581 | 9.16   | 0.003        |                                                                          |       |        |       |                 |       |        |       |        |       |        |       |                 |       |        |       |                                                                             |       |        |       |                 |  |    |  |     |  |    |  |                  |  |    |  |  |  |
| sT_NoInt        | 10581 | 9.50   | 0.003        |                                                                          |       |        |       |                 |       |        |       |        |       |        |       |                 |       |        |       |                                                                             |       |        |       |                 |  |    |  |     |  |    |  |                  |  |    |  |  |  |
| mT_aT_int       | 10581 | 9.73   | 0.002        | -0.081                                                                   | 0.279 | -0.064 | 0.107 | 0.075           | 0.102 | -0.053 | 0.068 |        |       |        |       |                 |       |        |       |                                                                             |       |        |       |                 |  |    |  |     |  |    |  |                  |  |    |  |  |  |
| all_sT_NoInt    | 10582 | 9.95   | 0.002        | -0.168                                                                   | 0.281 | -0.015 | 0.117 | 0.015           | 0.114 | -0.065 | 0.085 |        |       |        |       |                 |       |        |       |                                                                             |       |        |       |                 |  |    |  |     |  |    |  |                  |  |    |  |  |  |
| aT_NoInt        | 10582 | 9.97   | 0.002        |                                                                          |       |        |       | -0.134          | 0.092 | 0.010  | 0.062 |        |       |        |       |                 |       |        |       |                                                                             |       |        |       |                 |  |    |  |     |  |    |  |                  |  |    |  |  |  |
| mT_int          | 10582 | 10.18  | 0.002        | -0.010                                                                   | 0.263 | -0.090 | 0.104 |                 |       |        |       |        |       |        |       |                 |       |        |       |                                                                             |       |        |       |                 |  |    |  |     |  |    |  |                  |  |    |  |  |  |
| mT_sT_cvR_NoInt | 10582 | 10.47  | 0.002        | -0.017                                                                   | 0.223 | -0.069 | 0.097 |                 |       |        |       |        |       |        |       |                 |       |        |       |                                                                             |       |        |       |                 |  |    |  |     |  |    |  |                  |  |    |  |  |  |
| sT_cvR_NoInt    | 10582 | 10.50  | 0.002        |                                                                          |       |        |       |                 |       |        |       |        |       |        |       |                 |       |        |       |                                                                             |       |        |       |                 |  |    |  |     |  |    |  |                  |  |    |  |  |  |
| aT_mR_cvR_NoInt | 10582 | 10.78  | 0.001        |                                                                          |       |        |       | -0.048          | 0.108 | -0.003 | 0.077 |        |       |        |       |                 |       |        |       |                                                                             |       |        |       |                 |  |    |  |     |  |    |  |                  |  |    |  |  |  |
| all_int         | 10583 | 11.03  | 0.001        | -0.331                                                                   | 0.368 | 0.058  | 0.153 | 0.231           | 0.160 | -0.045 | 0.102 | -0.099 | 0.132 | -0.093 | 0.095 | -0.012          | 0.176 | -0.135 | 0.171 | -0.123                                                                      | 0.115 |        |       |                 |  |    |  |     |  |    |  |                  |  |    |  |  |  |
| all_cvR_int     | 10583 | 11.16  | 0.001        | -0.312                                                                   | 0.349 | 0.051  | 0.144 | 0.139           | 0.124 | -0.011 | 0.092 | -0.024 | 0.116 | -0.093 | 0.096 | 0.121           | 0.145 | -0.084 | 0.152 |                                                                             |       |        |       |                 |  |    |  |     |  |    |  |                  |  |    |  |  |  |
| mT_aT_sT_NoInt  | 10583 | 11.37  | 0.001        | 0.004                                                                    | 0.254 | -0.087 | 0.105 | -0.028          | 0.106 | 0.014  | 0.072 | -0.080 | 0.095 | -0.057 | 0.071 |                 |       |        |       |                                                                             |       |        |       |                 |  |    |  |     |  |    |  |                  |  |    |  |  |  |
| all_aT_int      | 10583 | 11.69  | 0.001        | -0.113                                                                   | 0.298 | -0.026 | 0.125 |                 |       |        |       |        |       |        |       |                 |       |        |       |                                                                             |       |        |       |                 |  |    |  |     |  |    |  |                  |  |    |  |  |  |
| aT_cvR_int      | 10583 | 11.69  | 0.001        |                                                                          |       |        |       | 0.097           | 0.116 | -0.039 | 0.070 |        |       |        |       |                 |       |        |       |                                                                             |       |        |       |                 |  |    |  |     |  |    |  |                  |  |    |  |  |  |
| all_mT_NoInt    | 10583 | 11.71  | 0.001        |                                                                          |       |        |       | -0.062          | 0.127 | 0.060  | 0.083 | 0.016  | 0.093 | -0.142 | 0.081 | 0.212           | 0.150 | -0.123 | 0.131 | 0.022                                                                       | 0.105 | -0.003 | 0.088 |                 |  |    |  |     |  |    |  |                  |  |    |  |  |  |
| sT_int          | 10583 | 11.73  | 0.001        |                                                                          |       |        |       |                 |       |        |       |        |       |        |       |                 |       |        |       |                                                                             |       |        |       |                 |  |    |  |     |  |    |  |                  |  |    |  |  |  |
| all_int         | 10584 | 11.97  | 0.001        | -0.133                                                                   | 0.293 | -0.023 | 0.127 | 0.020           | 0.143 | -0.007 | 0.093 | -0.021 | 0.108 | -0.116 | 0.082 | 0.107           | 0.155 | -0.220 | 0.142 | 0.007                                                                       | 0.105 | -0.035 | 0.098 |                 |  |    |  |     |  |    |  |                  |  |    |  |  |  |
| aT_cvR_NoInt    | 10584 | 12.13  | 0.001        |                                                                          |       |        |       | -0.046          | 0.106 | -0.002 | 0.062 |        |       |        |       |                 |       |        |       |                                                                             |       |        |       |                 |  |    |  |     |  |    |  |                  |  |    |  |  |  |

Table S1:

Statistical summary of the models linking survival rate to climate metrics.

The ‘model’ column provides a short model description, with: ‘T, R’ representing temperature and rainfall respectively; ‘m, a, s, cv’ the mean, amplitude of seasonal change, standard deviation and coefficient of variation (we used standardised variables); ‘Int , NoInt’ representing models with or without interaction terms (e.g. models with, or without, differential responses to climate metrics across age classes). The notation ‘.’ highlights the model including no climatic variables (e.g. estimating survival rates using a CMR model without covariates) while ‘all’ highlights the model with all climatic variables included (for simplicity, the model labelled ‘all –mT’ presents the model including all variables but the mean temperature and its quadratic component).

In the 3 next columns, the support for each model is presented, based on Akaike criterion and weight.

The furthest right column on the table presents the coefficient for each model linking the survival rate of juveniles and adults to specific climatic variables (we present the estimate for the linear and quadratic effect together with their standard error). When the model does not include an interaction term (noted ‘NoInt’), the coefficient(s) is the same for juvenile and adult survival.

Based on Akaike weight ( $w_i$ ), the most supported model ( $\mu_R$ ) shows almost three times the support of the second ranked model ( $\sigma_T, \mu_R$ ). These two primary models both include an interaction term highlighting the importance of considering differential relationships between climatic variables and the survival rates of juveniles and adults. This table is the basis of the model averaging, for which results are presented in Table 1 of the main text.
