# Supplementary material for: A Multi-Metric Approach to Investigate the Effects of Weather Conditions on the Demographic of a Terrestrial Mammal, the European Badger (Meles meles)
Source: PubMed Central journal article supplement (PMC3708947; doi:10.1371/journal.pone.0068116), 2013-07-11
Supplement: pone.0068116.s002.pdf [file pone.0068116.s002.pdf]

**Table S3**

| Model       | AICc  | Delta AICc | AICc Weights | Coefficient linking recruitment to specific climatic variables |       |                 |       |        |       |                 |       |        |       |                 |       |        |       |                 |       |        |       |                  |       |
|-------------|-------|------------|--------------|----------------------------------------------------------------|-------|-----------------|-------|--------|-------|-----------------|-------|--------|-------|-----------------|-------|--------|-------|-----------------|-------|--------|-------|------------------|-------|
|             |       |            |              | mT                                                             | SE    | mT <sup>2</sup> | SE    | aT     | SE    | aT <sup>2</sup> | SE    | sT     | SE    | sT <sup>2</sup> | SE    | mR     | SE    | mR <sup>2</sup> | SE    | cvR    | SE    | cvR <sup>2</sup> | SE    |
| all - mT    | 27307 | 0          | 0.301        |                                                                |       |                 |       | -0.072 | 0.094 | -0.179          | 0.064 | 0.036  | 0.062 | 0.151           | 0.063 | -0.494 | 0.112 | -0.219          | 0.100 | -0.042 | 0.072 | 0.108            | 0.052 |
| aT, sT, mR  | 27308 | 0          | 0.248        |                                                                |       |                 |       | -0.108 | 0.075 | -0.175          | 0.059 | 0.034  | 0.059 | 0.129           | 0.060 | -0.457 | 0.082 | -0.198          | 0.096 |        |       |                  |       |
| all - cvR   | 27308 | 1          | 0.163        | 0.089                                                          | 0.119 | -0.075          | 0.056 | -0.081 | 0.081 | -0.201          | 0.061 | 0.051  | 0.063 | 0.114           | 0.061 | -0.456 | 0.083 | -0.227          | 0.098 |        |       |                  |       |
| all         | 27309 | 2          | 0.119        | -0.119                                                         | 0.165 | 0.024           | 0.079 | -0.018 | 0.104 | -0.174          | 0.067 | 0.017  | 0.069 | 0.149           | 0.066 | -0.479 | 0.113 | -0.208          | 0.102 | -0.050 | 0.075 | 0.132            | 0.072 |
| aT, mR      | 27312 | 5          | 0.031        |                                                                |       |                 |       | -0.114 | 0.070 | -0.104          | 0.054 |        |       |                 |       | -0.372 | 0.062 | -0.139          | 0.091 |        |       |                  |       |
| mT, aT, mR  | 27312 | 5          | 0.028        | 0.023                                                          | 0.111 | -0.054          | 0.053 | -0.054 | 0.077 | -0.132          | 0.056 |        |       |                 |       | -0.372 | 0.065 | -0.169          | 0.094 |        |       |                  |       |
| all - aT    | 27312 | 5          | 0.024        | -0.303                                                         | 0.138 | 0.113           | 0.067 |        |       |                 |       | 0.000  | 0.056 | 0.110           | 0.060 | -0.342 | 0.082 | -0.115          | 0.088 | -0.029 | 0.058 | 0.197            | 0.064 |
| mT, mR, cvR | 27313 | 6          | 0.019        | -0.241                                                         | 0.131 | 0.074           | 0.062 |        |       |                 |       |        |       |                 |       | -0.304 | 0.073 | -0.093          | 0.086 | -0.045 | 0.058 | 0.147            | 0.060 |
| aT, mR, cvR | 27313 | 6          | 0.017        |                                                                |       |                 |       | -0.067 | 0.085 | -0.114          | 0.060 |        |       |                 |       | -0.418 | 0.086 | -0.149          | 0.093 | -0.067 | 0.068 | 0.071            | 0.050 |
| all - sT    | 27313 | 6          | 0.014        | -0.122                                                         | 0.148 | 0.015           | 0.070 | -0.003 | 0.090 | -0.116          | 0.065 |        |       |                 |       | -0.388 | 0.089 | -0.145          | 0.098 | -0.068 | 0.070 | 0.097            | 0.067 |
| mR, cvR     | 27314 | 7          | 0.008        |                                                                |       |                 |       |        |       |                 |       |        |       |                 |       | -0.355 | 0.069 | -0.152          | 0.082 | -0.057 | 0.053 | 0.093            | 0.049 |
| sT, mR, cvR | 27314 | 7          | 0.008        |                                                                |       |                 |       |        |       |                 |       | 0.020  | 0.054 | 0.088           | 0.055 | -0.370 | 0.076 | -0.179          | 0.084 | -0.031 | 0.055 | 0.124            | 0.052 |
| mR          | 27315 | 7          | 0.007        |                                                                |       |                 |       |        |       |                 |       |        |       |                 |       | -0.322 | 0.058 | -0.168          | 0.078 |        |       |                  |       |
| mT, mR      | 27315 | 8          | 0.007        | -0.056                                                         | 0.107 | -0.014          | 0.050 |        |       |                 |       |        |       |                 |       | -0.302 | 0.059 | -0.136          | 0.081 |        |       |                  |       |
| sT, mR      | 27316 | 9          | 0.003        |                                                                |       |                 |       |        |       |                 |       | -0.001 | 0.053 | 0.071           | 0.051 | -0.353 | 0.067 | -0.353          | 0.067 |        |       |                  |       |
| mT, sT, mR  | 27317 | 10         | 0.002        | -0.057                                                         | 0.110 | -0.008          | 0.052 |        |       |                 |       | 0.007  | 0.056 | 0.049           | 0.054 | -0.324 | 0.069 | -0.145          | 0.082 |        |       |                  |       |
| aT, sT, cvR | 27325 | 17         | 0.000        |                                                                |       |                 |       | -0.293 | 0.074 | -0.003          | 0.049 | 0.180  | 0.053 | 0.012           | 0.051 |        |       |                 |       | 0.172  | 0.054 | 0.116            | 0.052 |
| all - mR    | 27325 | 18         | 0.000        | -0.144                                                         | 0.154 | 0.026           | 0.071 | -0.212 | 0.090 | -0.006          | 0.053 | 0.149  | 0.060 | 0.012           | 0.053 |        |       |                 |       | 0.155  | 0.057 | 0.140            | 0.068 |
| mT, cvR     | 27326 | 19         | 0.000        | -0.324                                                         | 0.154 | 0.083           | 0.058 |        |       |                 |       |        |       |                 |       |        |       |                 |       |        |       |                  |       |
| mT, sT, cvR | 27327 | 19         | 0.000        | -0.308                                                         | 0.127 | 0.081           | 0.061 |        |       |                 |       | 0.086  | 0.052 | 0.011           | 0.053 |        |       |                 |       | 0.093  | 0.042 | 0.093            | 0.042 |
| mT, aT, cvR | 27329 | 22         | 0.000        | -0.297                                                         | 0.134 | 0.084           | 0.064 | -0.088 | 0.079 | 0.039           | 0.050 |        |       |                 |       |        |       |                 |       | 0.124  | 0.052 | 0.161            | 0.063 |
| aT, cvR     | 27334 | 27         | 0.000        |                                                                |       |                 |       | -0.203 | 0.070 | 0.044           | 0.047 |        |       |                 |       |        |       |                 |       | 0.163  | 0.049 | 0.090            | 0.050 |
| sT, cvR     | 27336 | 29         | 0.000        |                                                                |       |                 |       |        |       |                 |       | 0.123  | 0.050 | -0.007          | 0.050 |        |       |                 |       | 0.054  | 0.045 | 0.132            | 0.052 |
| mT, sT      | 27336 | 29         | 0.000        | -0.077                                                         | 0.105 | -0.021          | 0.050 |        |       |                 |       | 0.124  | 0.049 | -0.085          | 0.045 |        |       |                 |       |        |       |                  |       |
| mT, aT, sT  | 27337 | 30         | 0.000        | 0.000                                                          | 0.116 | -0.046          | 0.053 | -0.112 | 0.072 | -0.038          | 0.052 | 0.184  | 0.060 | -0.095          | 0.046 |        |       |                 |       |        |       |                  |       |
| aT, sT      | 27338 | 31         | 0.000        |                                                                |       |                 |       | -0.161 | 0.063 | -0.013          | 0.050 | 0.186  | 0.054 | -0.082          | 0.045 |        |       |                 |       |        |       |                  |       |
| cvR         | 27339 | 32         | 0.000        |                                                                |       |                 |       |        |       |                 |       |        |       |                 |       |        |       |                 |       | 0.078  | 0.039 | 0.102            | 0.050 |
| mT          | 27340 | 33         | 0.000        | -0.151                                                         | 0.101 | 0.017           | 0.048 |        |       |                 |       |        |       |                 |       |        |       |                 |       |        |       |                  |       |
| sT          | 27340 | 33         | 0.000        |                                                                |       |                 |       |        |       |                 |       | 0.126  | 0.047 | -0.062          | 0.043 |        |       |                 |       |        |       |                  |       |
| mT, aT      | 27344 | 37         | 0.000        | -0.150                                                         | 0.103 | 0.017           | 0.049 | 0.000  | 0.063 | -0.003          | 0.047 |        |       |                 |       |        |       |                 |       |        |       |                  |       |
| .           | 27344 | 37         | 0.000        |                                                                |       |                 |       |        |       |                 |       |        |       |                 |       |        |       |                 |       |        |       |                  |       |
| aT          | 27347 | 39         | 0.000        |                                                                |       |                 |       | -0.065 | 0.057 | 0.021           | 0.045 |        |       |                 |       |        |       |                 |       |        |       |                  |       |

**Table S2**

Statistical summary of the models linking recruitment to climate metrics.

The ‘model’ column provides a short model description with: ‘T, R’ representing temperature and rainfall respectively; ‘m, a, s, cv’ the mean, amplitude of seasonal change, standard deviation and coefficient of variation (we used standardised variables). The notation ‘.’ highlights the model with no climatic variables, while ‘all’ highlights the model with all climatic variables included (for simplicity, the model labelled ‘all –mT’ presents the model including all variables but the mean temperature and its quadratic component).

In the 3 next columns, the support for each model is presented, based on Akaike criterion and weight.

The furthest right columns on the table present the coefficient for each model linking the recruitment to specific climatic variables (we present the estimate for the linear and quadratic effect together with their standard error).

Based on Akaike weight ( $w_i$ ), all 16 first models include the mean rainfall and its quadratic component highlighting the importance of this parameter for badger recruitment (see table 2 of the main text).
