# Supplementary material for: A Multi-Metric Approach to Investigate the Effects of Weather Conditions on the Demographic of a Terrestrial Mammal, the European Badger (Meles meles)
Source: PubMed Central journal article supplement (PMC3708947; doi:10.1371/journal.pone.0068116), 2013-07-11
Supplement: pone.0068116.s003.pdf [file pone.0068116.s003.pdf]

## Text S1

In this appendix we provide analyses of correlation between weather metrics presented in the main text.

No correlation was found between the mean temperature and either the amplitude ( $b = 0.40$  with  $F_{126} = 0.16$ ,  $p = 0.84$ ,  $R^2 < 0.01$ ) or residual standard deviation in temperature ( $b = 0.08$  with  $F_{126} = 1.0$ ,  $p = 0.34$ ,  $R^2 < 0.01$ ) (Fig. S1-d and e). A positive correlation was found between the amplitude and the residual standard deviation in temperature ( $b = 0.49$  with  $F_{126} = 39.8$ ,  $p < 0.001$ ,  $R^2 = 0.24$ ) (Fig. S1-f).

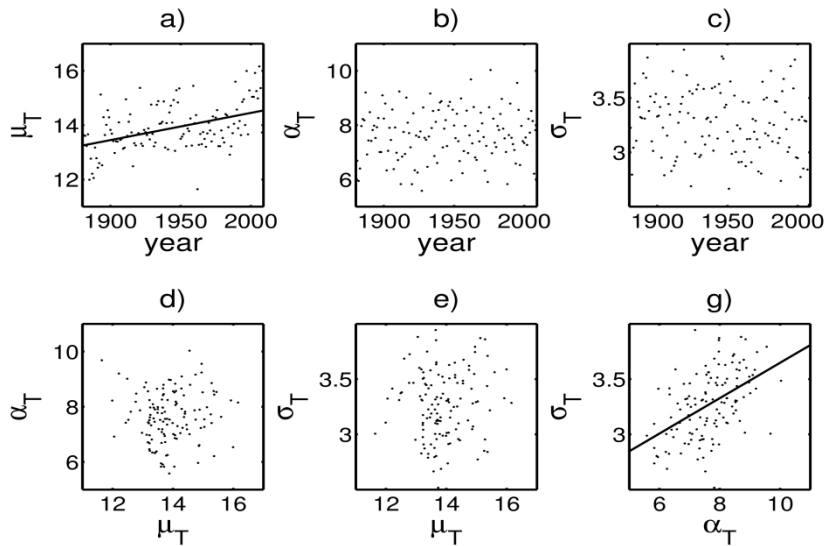

**Figure S1:** Mean (a), amplitude of seasonal changes (b) and residual standard deviation (c) in daily temperature for each year between 1881 and 2008. Only average temperature,  $\mu_T$ , showed a significant long-term increasing trend. Plots (d-f) show the relationship between mean temperature and amplitude (d); between mean temperature and residual standard deviation (e); and a significant correlation between amplitude and residual standard deviation (f).

A negative correlation was also observed between the two metrics ( $b = -0.49$  with  $F_{20} = 6.18$ ,  $p = 0.02$ ,  $R^2 = 0.24$ ) (Fig. S2-c), that is, as mean rainfall increased the scaled variation in rainfall declined – suggesting that these circumstances correspond with persistently wetter conditions.

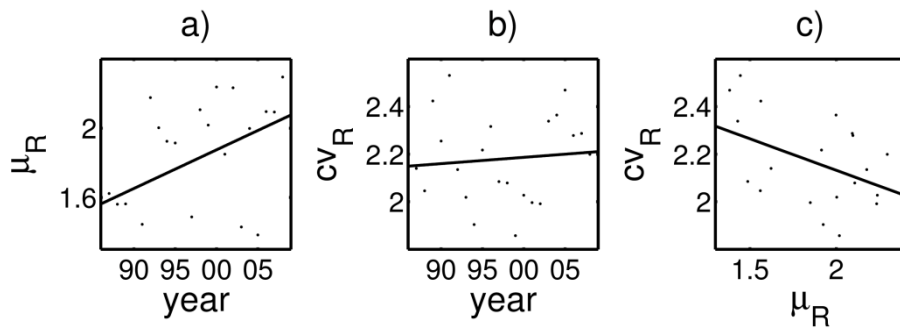

**Figure S2:** Mean (a) and coefficient of variation (b) in daily rainfall between April and September of each year between 1895 and 2009. Plot (c) shows the relationship between the mean and coefficient of variation. We observe that mean daily rainfall increases significantly with years, and a negative correlation between the mean and coefficient of variation.
